# Supplementary material for: Printable Metal-Polymer Conductors for Highly Stretchable Bio-Devices
Source: PubMed Central journal article supplement — iScience. 2018 Jun 14;4:302–11. doi: 10.1016/j.isci.2018.05.013 (PMC6146547; doi:10.1016/j.isci.2018.05.013), 2018-06-14
Supplement: mmc1.pdf [file mmc1.pdf]

**ISCI, Volume 4**

**Supplemental Information**

**Printable Metal-Polymer Conductors  
for Highly Stretchable Bio-Devices**

**Lixue Tang, Shiyu Cheng, Luyao Zhang, Hanbing Mi, Lei Mou, Shuaijian Yang, Zhiwei Huang, Xinghua Shi, and Xingyu Jiang**

1 **SUPPLEMENTAL FIGURES**

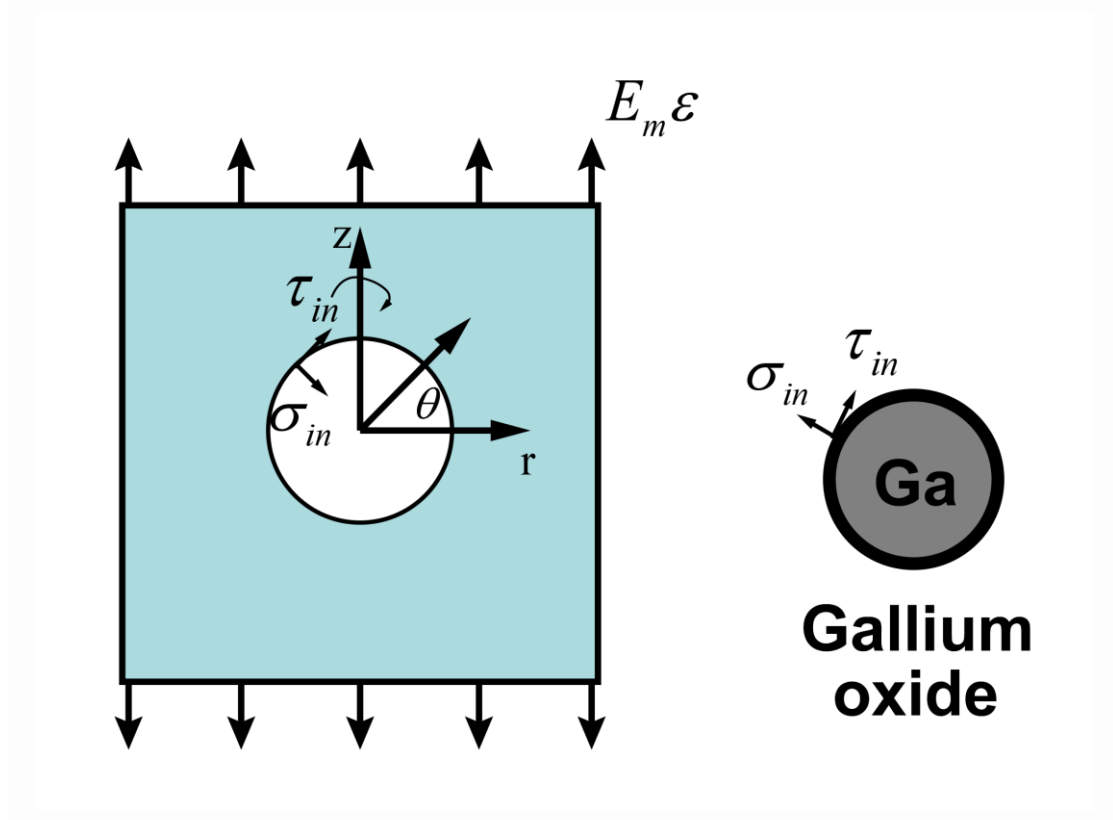

2

3 **Figure S1. The diagram of uniaxial loading, related to Figure 1. The stress**  
4 **components at the interface of PDMS matrix and gallium oxide shell is  $\sigma_{in}$  and  $\tau_{in}$ .**

5

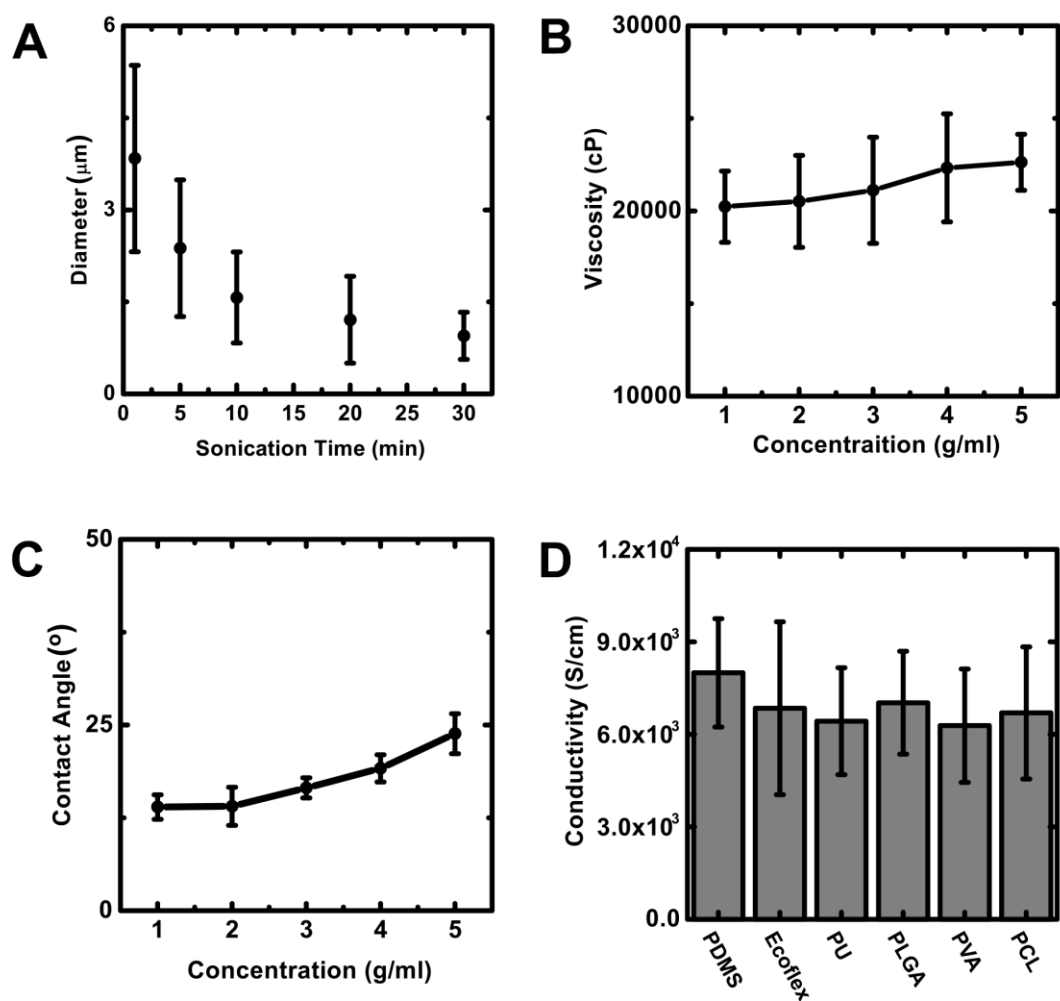

6

7 **Figure S2. Characterization of the LMPs ink, related to Figure 1.** (A) Average  
 8 diameter of LM particles as a function of sonication time. (B) The viscosity of the ink  
 9 as a function of the concentrations of the ink. (C) The contact angle between the  
 10 LMPs inks with different concentrations and the PET film. (D) Conductivity of MPC  
 11 cast by different polymers. Data are expressed as mean  $\pm$ SD.

12

13

**A Surface of the MPC**

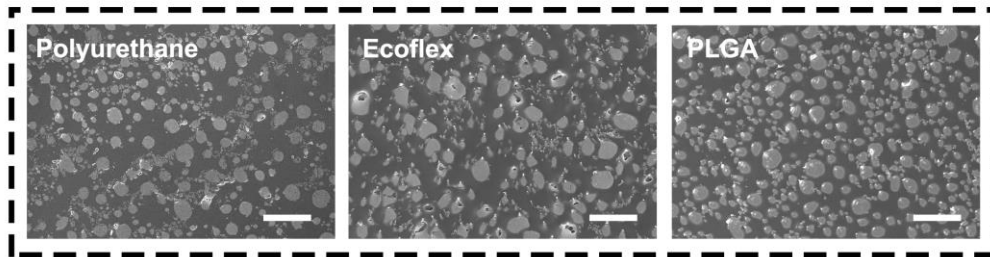

**B Inner Structure of the MPC**

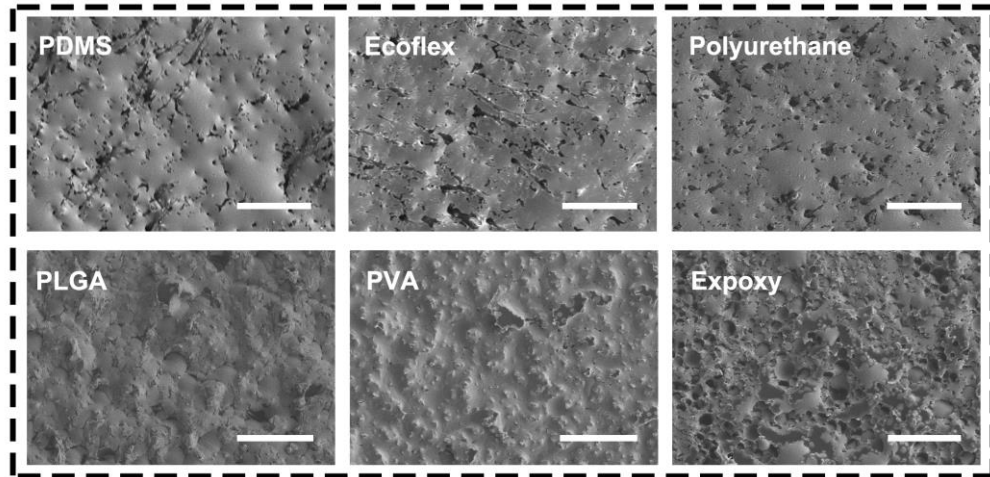

14

15 **Figure S3. Characterization of the MPC cast by different polymers, related to**

16 **Figure 2. (A)** The surface appearances of MPC cast by polyurethane, Ecoflex, and

17 PLGA, and it present an appearance of LM islands dispersing in the sea of polymer.

18 Scale bar, 20  $\mu\text{m}$ . **(B)** The pattern surfaces in partial transfer which represent the inner

19 structure of the MPC; they all have continuous metallic phase. Scale bar, 20  $\mu\text{m}$ .

20

21

22

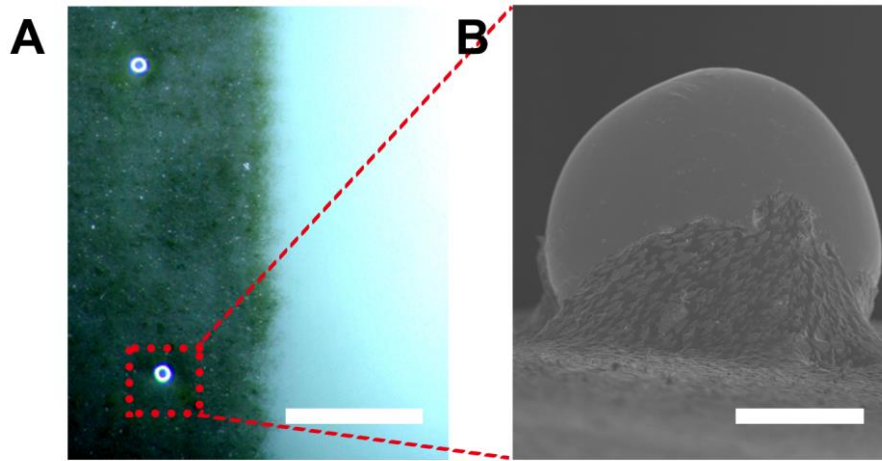

23

24 **Figure S4. Characterization of the MPC after the stretch cycle, related to Figure**

25 **2. (A) Optical image of the MPC after the stretch cycle, several liquid metal droplets**

26 **are squeezed out from the MPC, scale bar 500  $\mu\text{m}$ . (B) SEM image of the squeezed**

27 **liquid metal droplet. Scale bar 30  $\mu\text{m}$ .**

28

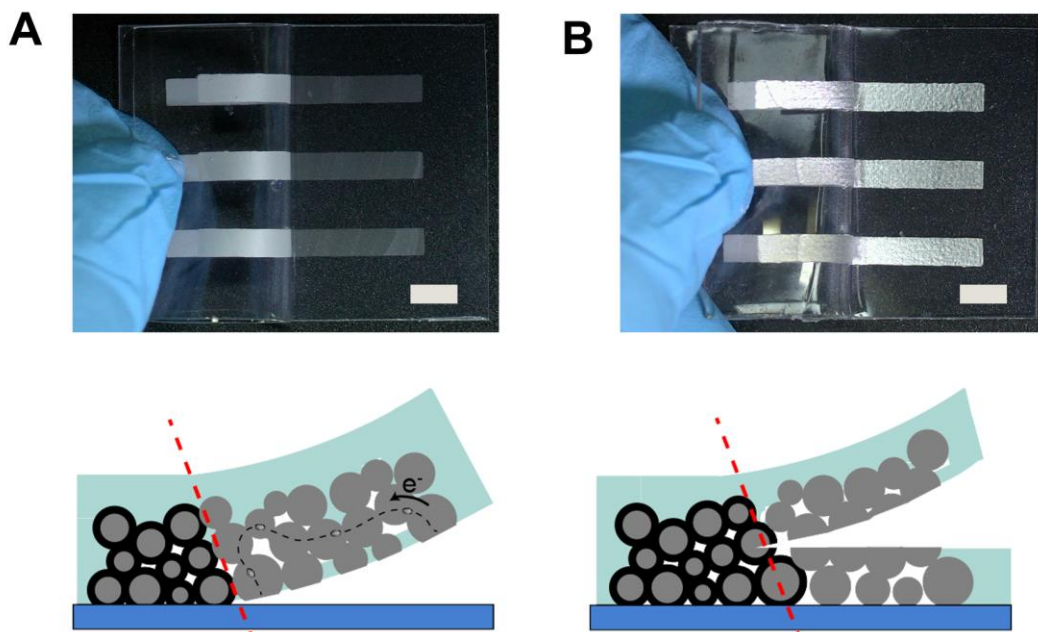

29

30 **Figure S5. Entire transfer and partial transfer, related to Figure 3. (A) Entire**

31 **transfer of the MPC patterns to the SL (PDMS), leaving only oxide on the IPL (PET)**

32 film). (B) Partial transfer of the MPC patterns, and both of the IPL and SL have  
 33 integrated MPC pattern. Scale bar 10 mm.

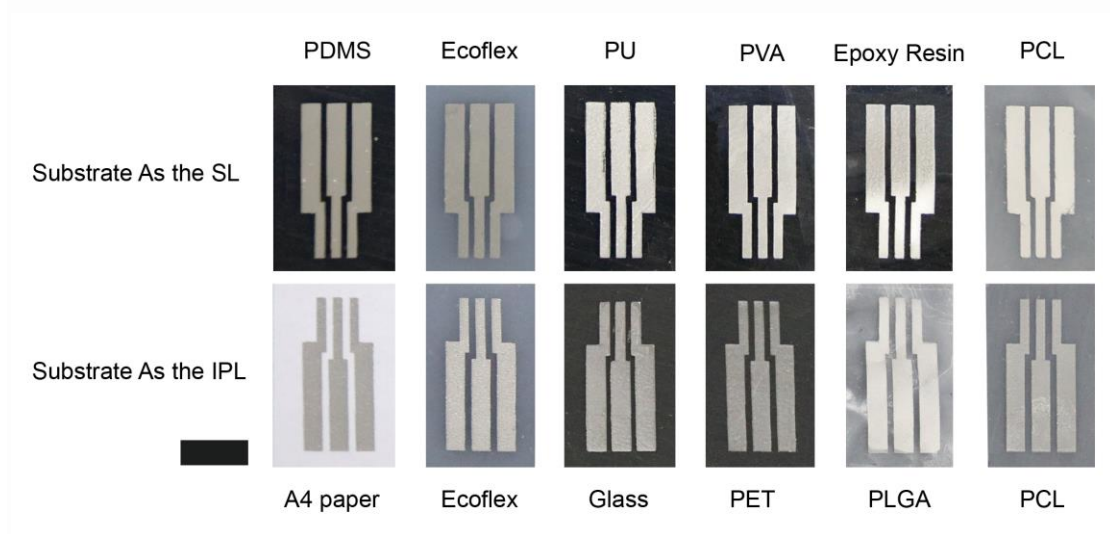

34  
 35 **Figure S6. MPC transfer to different substrates, related to Figure 3.** Scale bar, 10  
 36 mm.

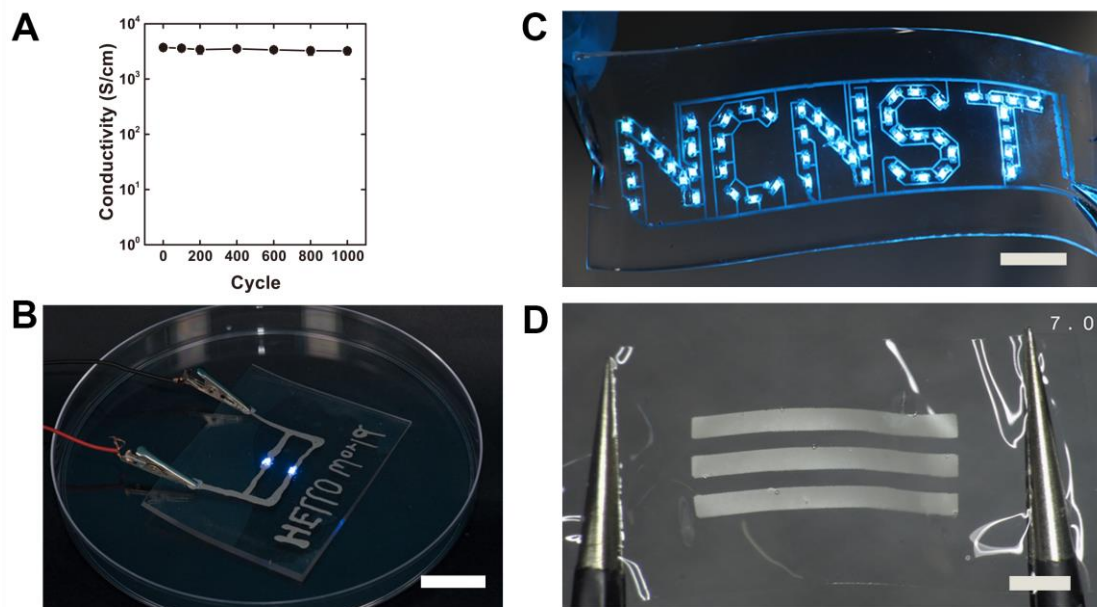

38  
 39 **Figure S7. MPC patterns as interconnects, related to Figure 3.** (A) Conductivity  
 40 changes with the bending for 1,000 cycles. (B) We use handwriting method to  
 41 fabricate a flexible and stretchable LED circuit on the PDMS substrate. Scale bar, 15



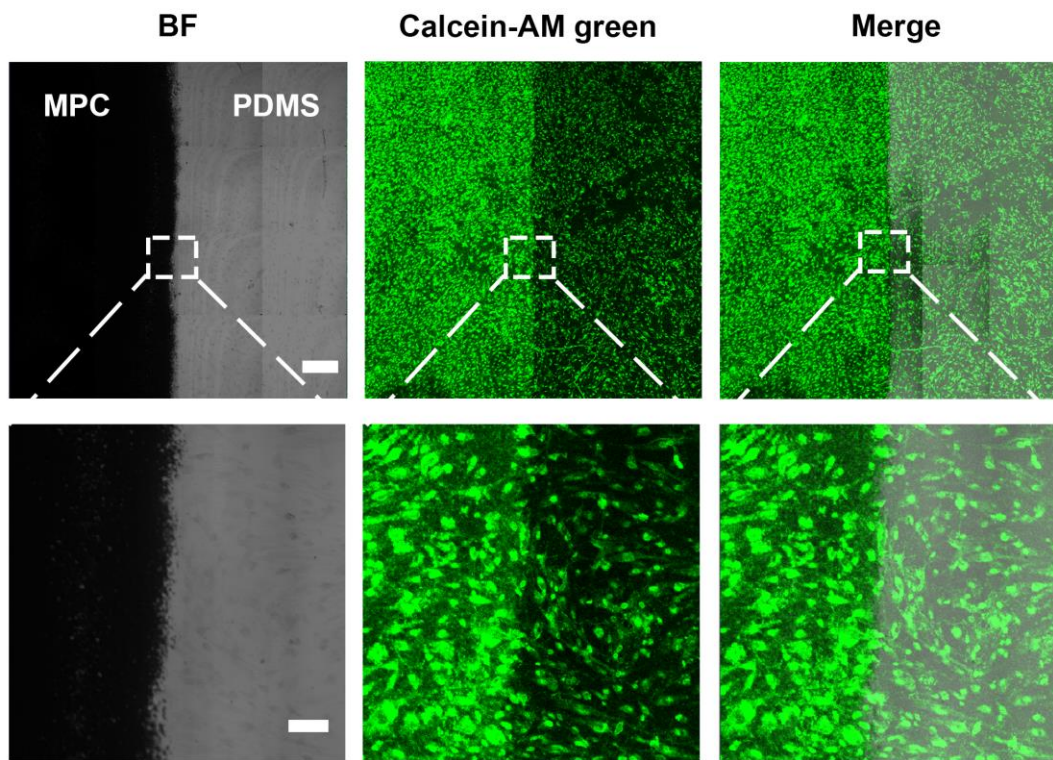

51

52 **Figure S9. Viability test of the HUVECs on the MPC-PDMS interface after 7**  
 53 **days, related to Figure 5. Cells are stained by Calcein-AM green (Invitrogen, US),**

54 **Scale bar, (top) 400  $\mu\text{m}$ , (bottom) 100  $\mu\text{m}$ .**

55



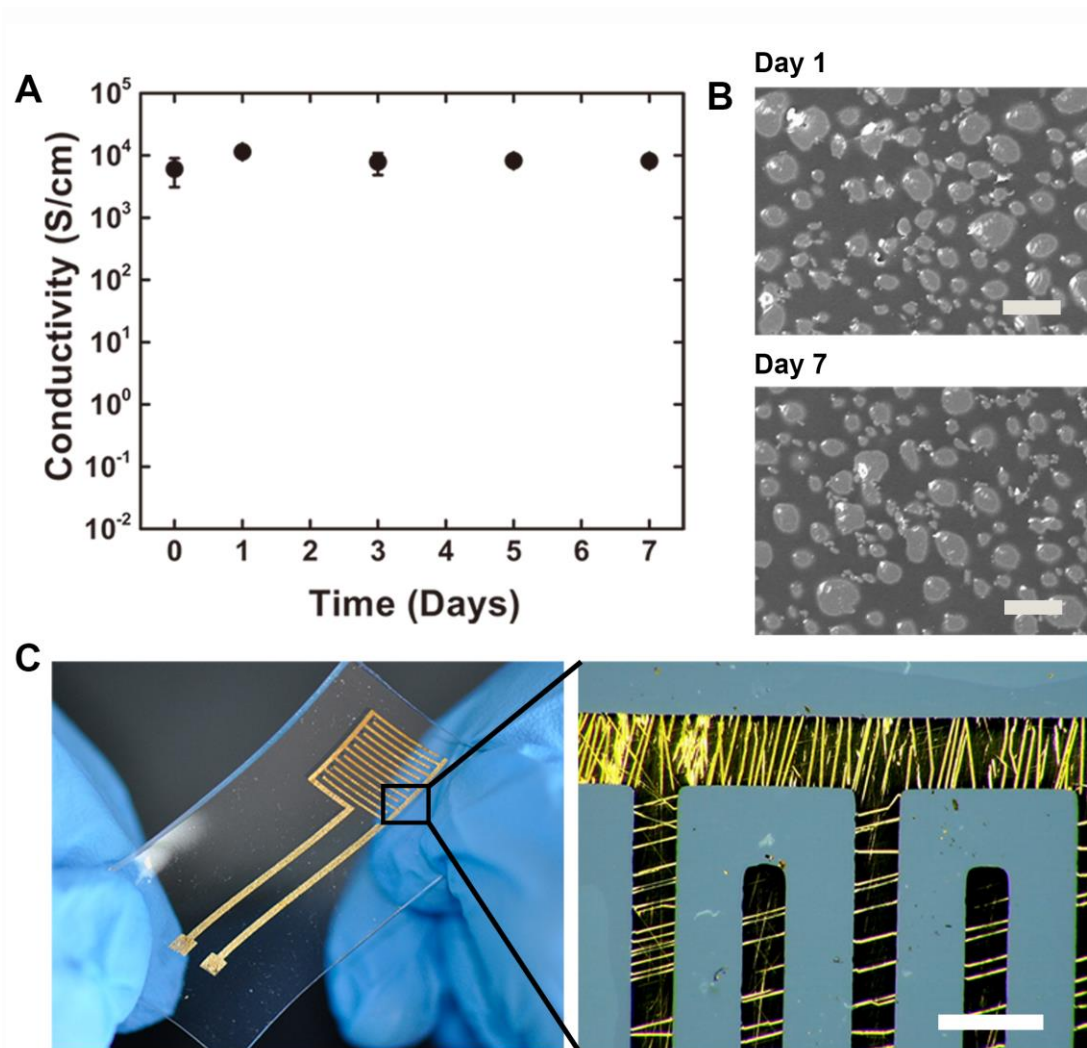

56

57 **Figure S10. Tolerance of the MPC and the gold electrode, related to Figure 5. (A,**

58 **B) Degradation exploration of the MPC. (A) Conductivity of the MPC dependence on**  
 59 **culturing time. (B) SEM characterization of the surface of MPC electrodes exposed in**

60 **DMEM. Scale bar, 10  $\mu$ m. (C) The gold electrode on the PDMS substrates lost its**  
 61 **conductivity after the tensile cycle due to the forming of cracks. Scale bar, 500  $\mu$ m.**

62 **Data are expressed as mean  $\pm$ SD**

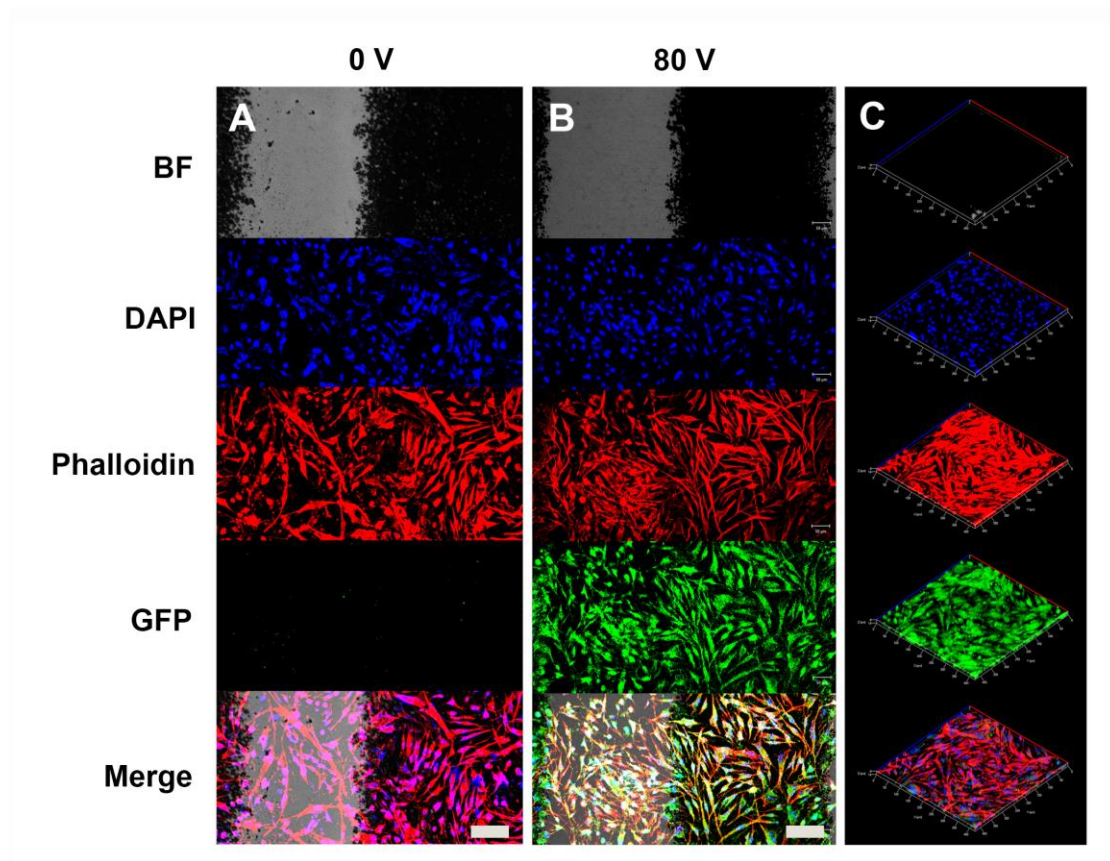

63

64 **Figure S11. GFP plasmid delivery in Fibroblasts, related to Figure 5. A, B,**

65 Fluorescent cytoskeleton staining of fibroblasts on and adjacent to the MPC (A)

66 without and (B) with electroporation. Scale bar, 100  $\mu\text{m}$ . (C) 3D distribution of

67 fibroblasts on the MPC treated by electroporation. The nucleus (blue) and F-actin

68 (red) are stained by Hoechst 33342 and Alexa Fluor 568-labelled phalloidin,

69 respectively.

70

71

72

73

74

75

76

77

78

79

80

## 81 SUPPLEMENTAL TABLES

82 **Table S1. Typical value of parameters we used in this study, related to Figure 1.**

|                                                                         |                             |                                                    |                              |
|-------------------------------------------------------------------------|-----------------------------|----------------------------------------------------|------------------------------|
| The Young's modulus and Poisson's ratio of Gallium Oxide <sup>[a]</sup> | $E_s=8$ GPa<br>$\mu_s=0.3$  | The Young's modulus and Poisson's ratio of PDMS    | $E_m=1.2$ MPa<br>$\mu_m=0.5$ |
| The yield stress of Gallium Oxide <sup>[a]</sup>                        | $\sigma_y=200$ MPa          | The thickness of the PDMS                          | $h=50$ $\mu\text{m}$         |
| The radius of droplets                                                  | $R=3$ $\mu\text{m}$         | The thickness of Gallium oxide film <sup>[b]</sup> | $t=0.5$ nm                   |
| The typical curvature of the PDMS film                                  | $\kappa=1$ $\text{mm}^{-1}$ |                                                    |                              |

83 [a] (Dickey et al., 2008)

84 [b] (Boley et al., 2015)

85

86

## 87 TRANSPARENT METHODS

88 **Mechanical Calculation.** We obtained micro particles of gallium alloy through  
89 sonication. The surface of these droplets will form an oxidation layer (Lin et al., 2015;  
90 Boley et al., 2015). The thickness of the oxide layer is about 0.5 nm (Boley et al.,  
91 2015). This thin oxide layer will keep the shape of the droplets and make it behave  
92 like an elastic material (Boley et al., 2015; Lawrenz et al., 2015). When the film  
93 experience a large enough stress, it will yield and flow readily (Lawrenz et al., 2015).  
94 According to the data of Dickey et al.'s previous research (Dickey et al., 2008), the  
95 Young's modulus ( $E$ ) and the yield stress ( $\sigma_y$ ) of the oxidation layer are estimated to  
96 be 8 GPa and 200 MPa respectively.

97 To prove the stress during stripping can effectively break the oxide layer of LMPs  
98 embedded in elastomers, we performed theoretical calculation. We analyze the stress  
99 of liquid metal particles on the bending part (Fig. 1a). The model can be simplified as  
100 a gallium particle embedded in a PDMS (polydimethylsiloxane) matrix. When we  
101 peeled the PDMS film off the glass matrix, the liquid metal particle patterns will be  
102 conductive. Based on this, we will give a theory explanation of this phenomenon.

103 When we peel the PDMS film off a substrate like PET, the film will have a  
104 curvature. The gallium droplets are at the bottom of the PDMS. So they will suffer a  
105 large stress and the oxide layer of the gallium droplets will yield.

106 According to the bending theory, the stain at the bottom of the PDMS can be  
107 written as

108  $\varepsilon = \frac{\kappa h}{2}$  (1)

109 In which,  $h$  is the thickness of the PDMS and  $\kappa$  is the curvature radius of the PDMS.  
 110 We will calculate the relation of the stress of gallium droplet and the PDMS strain  $\varepsilon$ . As  
 111 shown in fig. S1, the PDMS matrix is assumed as an infinite solid and the gallium  
 112 droplet with a thin oxide layer is assumed as a thin walled sphere with a radius  $R$  and a  
 113 thickness  $t$ . Far from the sphere, the matrix is subjected to a tensile stress  $\sigma_z = E_m \varepsilon$ ,  
 114 with all other stress components zero. The stress field of PDMS matrix  $\sigma'_{ij}$  is

115  $\sigma'_r = \frac{B}{2} + \left[ A - \frac{3}{2}C \right] \frac{1}{r^3} + \frac{D}{2r^5} + \frac{1}{2} \left[ B - 9\frac{C}{r^3} + 3\frac{D}{r^5} \right] \cos 2\theta$  (2)

116  $\sigma'_\theta = \frac{B}{2} - \frac{A}{2r^3} - \frac{D}{8r^5} - \left( \frac{B}{2} + \frac{7D}{8r^5} \right) \cos 2\theta$  (3)

117  $\sigma'_\phi = -\frac{A}{2r^3} - \frac{3D}{8r^5} - \frac{5D}{8r^5} \cos 2\theta$  (4)

118  $\tau'_{r\theta} = \left( -\frac{B}{2} - \frac{3C}{2r^3} + \frac{D}{r^5} \right) \sin 2\theta$  (5)

119 And in which,  $A$ ,  $B$ ,  $C$ ,  $D$  are constants which are determined by the boundary  
 120 conditions. Then the stress field of the oxide layer of the gallium droplet  $\sigma_{ij}$  can be  
 121 written as

122  $\sigma_\theta = \frac{R}{t} (H + I \cos 2\theta)$  (6)

123  $\sigma_\phi = \frac{R}{t} \left[ \sigma_a - H + (\sigma_b - I) \cos 2\theta \right]$  (7)

124 Where  $H$ ,  $I$  and  $\sigma_b$  are constants. And the boundary condition is at  $r \rightarrow \infty$ ,

125  $\sigma'_r = \frac{E_m \varepsilon}{2} + \frac{E_m \varepsilon}{2} \cos 2\theta$  ,  $\tau'_{r\theta} = -\frac{E_m \varepsilon}{2} \sin 2\theta$  (8)

126 And finally, we can obtain the maximum Tresca's equivalent stress of the oxide layer  
 127 is

128  $\sigma_{\max} = \frac{5RE_m \varepsilon}{2t}$  (9)

129 The typical value of parameters we used in this study are listed in table S1. Substituting  
 130 the value in table 1 in the Equation (9), we obtain

131  $\sigma_{\max} = 4500$  MPa

132 And this value is great larger than the yield stress of gallium oxide (about 200 MPa).  
 133 So the oxide layer of the gallium droplet will yield.

134

135 **Preparation of the low-melting metal particle inks.** 1 g, 1.5 g, 2g, 2.5 g, 3 g, 4 g, and  
 136 5 g EGaIn (Gallium Indium eutectic, 99.99%, Sigma-Aldrich) was added into 5 mL  
 137 centrifuge tube filled with 1 mL n-Decyl alcohol (98%, MACKLIN, China),  
 138 respectively and sonicated by a sonicator (Scientz, Scientz-IIID). For screen printing,  
 139 we sonicated the EGaIn for 1 min with the power of 300 W. For microfluidic patterning,  
 140 5 min with 300 W is required.

141 We also adopted alloy with melting point 47 °C (Sn 8.30, Pb 22.60, Bi 44.70, Cd  
142 5.30, In 19.10, Taobao, China) to prepare the low-melting metal particle inks. 2.5 g  
143 alloy was added to 1 mL n-Decyl alcohol (98%, MACKLIN, China). We heated the  
144 alloy in an oven at 80 °C for 10 min to melt the alloy and sonicated the melting alloy  
145 for 1 min with the power of 300 W.

146

147 **Screen printing of the LMPs ink.** The printing of liquid metal particle was realized  
148 by a screen printing equipment (Taobao, China). We used the liquid metal particle ink  
149 to print desired patterns on various substrates including PET, PCL, PLGA, PDMS  
150 films, A4 paper, and glass with 200 mesh screen printing plates.

151

152 **Microfluidic patterning of the LMPs ink.** The microstructures are obtain by soft  
153 lithography. Briefly, we used silicon wafer or printed circuit boards (PCB) as the  
154 master molds. To obtain silicon wafer as the master wafer, we followed standard  
155 photolithography. Master fabrication for the microfluidic channels begins with spin  
156 coating negative photoresists (SU8 2035, MicroChem Corp., US) on a silicon wafer at  
157 1200 rpm for 30 s (100 µm thick). After baking the photoresist at 95 °C for 5 min, the  
158 wafer was exposed to UV light for 90 s through a mask. After baking the wafer at 95  
159 °C for 10 min, we immersed the wafer into a developer (SU8 developer, MicroChem  
160 Corp, US.) and washed it for 5 min.

161

162 We also use the PCB (Jiekecengfeng Corp., China) as the master wafer. The  
163 thickness of the copper film is 150 µm. We cast a layer of PDMS onto the master  
164 mold. After baking in an oven at 80 °C for 40 min, we removed the PDMS replica  
165 from master. We spread LM particle inks onto the patterned PDMS. Before the  
166 evaporation of the solvent, we filled the microfluidic channel with EGaIn particle ink  
167 using a blade or squeegee, and excess ink was scraped off the substrate.

167

168 **The fabrication of MPC by casting and peeling.** After evaporation of the solvent,  
169 we used various polymers for casting on the patterned LMPs. We dissolved poly  
170 (caprolactone) (PCL, Mn=80000 g/mol, Sigma-Aldrich, US) pellets in  
171 dimethylformamide (DMF, ThermoFisher Scientific, US) and CH<sub>2</sub>Cl<sub>2</sub> (Aladdin,  
172 China) with a ratio of 1:3 (w/w) at 5 wt% to prepare the PCL solution. We prepared  
173 the 5 wt% poly (vinyl alcohol) (PVA) (1795, Aladdin, China) solution (w/w) by  
174 dissolving PVA in ultrapure water (Milli-Q Reference, MERCK, France) in water bath  
175 at 95 °C for 1 hour. We dissolved poly (DL-lactide-co-glycolide) (PLGA 75:25,  
176 Mw=114 kDa, Lakeshore Biomaterials, US) particles in acetone/DMF with a ratio of  
177 2:1 (w/w) at 5 wt% to prepare the PLGA solution. We prepared the PDMS prepolymer  
178 by mixing base and curing agent with a ratio of 10:1, 15:1, 20:1, 25:1, 30:1, and 35:1  
179 (w/w). We prepared the Ecoflex prepolymer by mixing part A and part B with a ratio  
180 of 1:1 (w/w). We prepared the epoxy sealant prepolymer (epoxy sealant, Ausbond,  
181 US) by mixing part A and part B with a ratio of 5:4 (w/w). We prepared the  
182 polyurethane (PU) (polyurethane sealant, Ausbond, US) prepolymer by mixing part A  
183 and part B with a ratio of 1:1 (w/w). These prepolymers were thoroughly mixed and  
184 degassed in a mixer (AR-100, THINKY, Japan).

185 We cast polymer solutions or prepolymers onto the LMPs patterns. These cast  
186 polymer solutions were placed in a chemical hood in room temperature for 24 h to  
187 volatile solvents. While the cast PDMS, PU, and epoxy resin prepolymers were  
188 placed in 80 °C oven for 40 min or in room temperature for 12 hours.

189 After curing, these polymer films were peeled off from the substrates. Thus  
190 conductive MPC on different polymer substrates were obtained either on IPL or SL.  
191 To obtain MPC patterns on the PDMS ultrathin film (30 μm), we spin-coated the  
192 PDMS at 4500 r for 20 s after the casting process.

193  
194 **Particles and MPC characterization.** Inks (2.5 g/mL for 1 min) for Scanning  
195 Electron Microscopy (SEM, S4800, Hitachi, Japan) characterizations were fabricated  
196 by sonicating EGaIn for 1 min, 5 min, 10 min, 20 min, and 30 min, respectively. We  
197 deposited 100 μL suspension on conductive tape via micropipette (Eppendorf,  
198 Germany) and allowed them to dry in 80 °C oven for 10 min. MPC for SEM  
199 characterizations were prepared by screen printing using different polymers as SL  
200 (PDMS, Ecoflex, PLGA, PVA, PCL, PU, and epoxy resin).

201 The LM dissolved MPC for SEM characterizations were fabricated by  
202 immersing the MPC patterns (2.5 g/mL) on 0.1 M sulfuric acid for 10 h. We use the  
203 LM dissolved MPC for the thickness measurements. Briefly, we cut the sample with a  
204 blade and characterized the cross section of the sample using SEM.

#### 205 206 **Measurement of the liquid metal consumptions and transfer amount of the MPC.**

207 We used screen printing method to print liquid metal particles (2.5 g/mL) on PET  
208 films as a shape of a strip (3\*30 mm). After the evaporation of solution in an oven at  
209 80 °C for 10 min, we cast PDMS of different ratio (10:1, 15:1, 20:1, 25:1, and 30:1)  
210 on different PET films, respectively. The PDMS films were peeling from PET films  
211 after curing in 80 °C for 40 min. We weighed these PET films using a precision  
212 balance (AL104, METTLER TOLEDO, Switzerland) before printing, after printing,  
213 after evaporation, and after peeling off, respectively.

214  
215 **Tensile test.** Samples for stretching test were prepared by screen printing inks with  
216 concentration of 1 g/ml, 2 g/ml, 3 g/ml, 4 g/ml, and 5 g/ml, respectively. We made the  
217 MPC into a strip shape (800 μm in width and 4 cm in length) using PET as the IPL  
218 and Ecoflex as the SL. The MPC strips were connected with a 100 Ω resistance and  
219 mounted on a homemade frame. We measured resistance of the MPC using  
220 multimeter (8846A, FLUKE, US) when they were gradually stretched to 500% strain.

221  
222 **Cycling test.** Samples for stretching cycling test were prepared by screen printing  
223 EGaIn inks with concentration of 2.5 g/ml. Samples for bending cycling test were  
224 prepared by screen printing 47 °C low melting alloy particle inks with concentration  
225 of 2.5 g/ml. We made the MPC into a strip shape (800 μm in width and 2 cm in  
226 length) using PET as the IPL and PDMS (10:1) as the SL. We performed the  
227 stretching cycling test for 10,000 cycles using a dynamic mechanic analysis (DMA  
228 Q800, TA Instruments, US) under a strain rate of 100% /min with maximum strain of

229 50%. We performed the bending tests on dynamic mechanic analysis under a strain  
230 rate of 100% /min with a displacement of 1 cm for 1,000 cycles

231

232 **Circuits assembly.** To assembly a functional circuits, we first used a pipette to add 2  
233  $\mu\text{L}$  EGaIn onto each contact pad of interconnects. Subsequently, we gently rubbed  
234 EGaIn into the surface of electronic components to wet their pins and connected  
235 electronic components with the touch pads. Finally, a layer of elastomer was cast to  
236 encapsulate the circuits.

237

238 **Fabrication and characterization of the strains sensors and virtual keyboard.** We  
239 printed EGaIn LMPs ink (2.5 g/mL) on PET films by screen printing as serpentine  
240 shapes with the width of 200  $\mu\text{m}$ . After solvent evaporation at 80 °C for 10 min, we  
241 spin-coated the PDMS (10:1) at 1000 r for 20 s on the LMPs patterns. . After curing at  
242 80 °C for 30 min, the PDMS films with serpentine MPC (strain sensors) were  
243 carefully peeled off from PET films. We used silica adhesive (3145 RTV, Dow  
244 Corning, US) to attach strain sensors on a glove to monitor the motion of different  
245 fingers by capturing resistance change.

246 We wore the strain sensors-mounted glove to monitor motions of fingers. The  
247 strain sensors were connected to electrochemical workstation (1040C, CH  
248 Instruments, US). We tested the resistant changes of the sensors by using the  
249 technique amperometric i-t curve at potential 0.001 V.

250 The virtual keyboards were achieved by connecting the glove to Arduino  
251 (MEGA 2560, ITALY), and processed signals using MATLAB.

252

253 **Cell culture, staining and characterization.** Samples for cell experiments were  
254 prepared by screen printing inks with concentration of 2.5 g/ml. We made the MPC  
255 using PET as the IPL and PDMS (10:1) as the SL. Before cell culture, we sterilized all  
256 the samples by radiation with a cobalt radiation device (Co 5 60, 10-130 Gymin-1,  
257 Peking University, China). The MPC was incubated with fibronectin solution (50  
258  $\mu\text{g}/\text{ml}$ ) for 6 h at room temperature to promote the adhesion of cells. We seeded  
259 human umbilical vein endothelial cells (HUVECs, ATCC, US) and human aortic  
260 fibroblasts (Science Cell, US) on the surface of the MPC, and culture them in DMEM  
261 supplemented with 10% fetal bovine serum (5%  $\text{CO}_2$ , 37 °C) for 7 days. HUVECs  
262 were stained with live/dead kit (Invitrogen, US) for cell viability test. Briefly, we  
263 fixed cells with 4% paraformaldehyde aqueous solution for 10 min. Subsequently, we  
264 stained the cells with the dyes at a concentration of 1  $\mu\text{g}/\text{mL}$  for 20 min, and removed  
265 excess dyes by 3 times rinsing the cells with phosphate buffered saline (PBS).  
266 (Invitrogen, US) We stained the nucleus with Hoechst 33342 (Invitrogen, US) at a  
267 concentration of 1  $\mu\text{L}/\text{mL}$  for 5 min, and removed excess dyes by 3 times rinsing the  
268 cells with PBS. We stained the F-actin with Alexa Fluor 568-labelled phalloidin  
269 (Invitrogen, US) at a concentration of 200 units/mL for 20 min, and removed excess  
270 dyes by 5 times rinsing the cells with PBS. The fluorescent images of cells was taken  
271 by laser scanning confocal microscopy (LSM 710, Zeiss, Germany). Before SEM  
272 characterization, we fixed cells with 4% paraformaldehyde aqueous solution for 30



273 min and dehydrated the sample with ethanol at the concentrations of 50%, 75%, and  
274 100% for 10 min, sequentially.

275

276 **Electroporation.** We printed the MPC electrodes for electroporation with 2.5 g/mL  
277 EGaIn LMPs, using PDMS (10:1) as the SL and PET as the IPL. We deposited 100  
278 nm thick gold on the surface of PDMS by evaporation (Ohmiker-50B, Cello  
279 Technology Corporation, Taiwan) to fabricate gold electrodes as a control group.  
280 Human aortic fibroblasts were used to verify the electroporation of green fluorescent  
281 protein (GFP, RiboBio, China). We incubated the MPC electrodes with the  
282 fibronectin plasma solution (50 µg/ml) for 6 h at room temperature to promote  
283 adhesion of cells. Subsequently, fibroblasts were delivered on the MPC electrode  
284 (PDMS as the substrates) and cultured for 24 h. We washed the sample 3 times before  
285 electroporation and immersed the surface of the electrodes in GFP solution at a  
286 concentration of 40 µg/ml. We applied 5 electrical pulses using an electroporator by  
287 exerting a square wave pulse (Electro Square Porator<sup>TM</sup> ECM 830, BTX, USA). The  
288 voltage is 80 V, the pulse duration is 100 µs, and the pulse interval is 1 s. After  
289 culturing for 24 h, we stained the cells as above-mentioned and used confocal  
290 microscopy to image the cells.

291

## 292 SUPPLEMENTAL REFERENCES

293 Lawrenz, F.; Lange, P.; Severin, N.; Rabe, J. P.; Helm, C. A.; Block, S. Morphology, Mechanical  
294 Stability, and Protective Properties of Ultrathin Gallium Oxide Coatings. (2015). *Langmuir* 31,  
295 5836–5842.

296 Dickey, B. M. D.; Chiechi, R. C.; Larsen, R. J.; Weiss, E. A.; Weitz, D. A.; Whitesides, G. M.  
297 Eutectic Gallium-Indium (EGaIn): A Liquid Metal Alloy for the Formation of Stable Structures in  
298 Microchannels at Room Temperature. (2008). *Adv. Funct. Mater.* 18, 1097-1104.

299

300
